## Original Article

### Cardiovascular Risk Factors in Nurses at a Teaching Hospital

Lucas Kleebank Fernandes<sup>1</sup>, Gisele Brasil Nobre Chaves Rangel<sup>1</sup>, Renan Luís Martins<sup>1</sup>,  
Danilo Fernando Martin<sup>2</sup>, Moacir Fernandes de Godoy<sup>3</sup>

<sup>1</sup>Medical Student at São José do Rio Preto Faculty of Medicine (FAMERP), São José do Rio Preto, São Paulo, Brazil

<sup>2</sup>Assistant Professor at São José do Rio Preto Faculty of Medicine (FAMERP), Department of Cardiology and Cardiovascular Surgery, São José do Rio Preto, São Paulo, Brazil

<sup>3</sup>Adjunct Professor at São José do Rio Preto Faculty of Medicine (FAMERP), Department of Cardiology and Cardiovascular Surgery, São José do Rio Preto, São Paulo, Brazil

#### ABSTRACT

**Objective:** To identify the prevalence of modifiable and non-modifiable risk factors related to cardiovascular diseases [CVDs] in the nursing team of a tertiary hospital in the interior of the state of São Paulo and suggest preventive practices. **Methods:** This is a prospective-analytical epidemiological study, of a quantitative nature, carried out on 226 employees, in two stages: collection of self-declared data and measurement of anthropometric data. **Results:** Risk factors such as family history of CVD (82.7%), alcoholism (57.1%), sedentary lifestyle (49.1%), insufficient sleep time (27.9%), high consumption of processed meals (98.2%) and sugary beverages (81.7%) were observed, among others. From anthropometric data, it was identified that 69.4% of participants are overweight (38.7%) or obese (30.6%) - evidenced by high waist circumference (48.6%) and a high waist-to-hip ratio (64.0%) - in addition to 17.1% who had blood pressure levels indicative of arterial hypertension. The majority reported not having a diagnosis of CVDs (76.1%), however, among those who do, more than half (53.7%) do not treat them properly. **Conclusion:** It is observed that the prevalence of CVDs is not irrelevant in the group evaluated and that there is the presence of risk factors indicating a tendency for participants to develop new CVDs or worsen existing ones, due to the presence of harmful habits associated with an unhealthy lifestyle and lack of adherence to treatments. This study suggests the implementation of multidisciplinary action programs with employees, so that the main areas identified as deficient are addressed.

**NOTE:** This preprint reports new research that has not been certified by peer review and should not be used to guide clinical practice.

**Keywords:** Health Occupations; Cardiovascular Diseases; Nursing; Risk Factors

## INTRODUCTION

According to World Health Organization data from 2021, cardiovascular diseases [CVD] are the leading causes of death worldwide, resulting in the loss of 17.9 million lives per year, which is equivalent to 32% of global deaths. Most of these occurrences (85%) are due to heart attacks and strokes. One third of them affect people under the age of 70<sup>1</sup>. In a study carried out in the city of São José do Rio Preto in 2013, it was identified that CVDs were responsible for a rate of 195.9 deaths for every 100,000 inhabitants, which is equivalent to 31.7% of deaths<sup>2</sup>. Therefore, identifying populations at risk and mitigating modifiable factors, as well as promoting appropriate treatment can help prevent avoidable losses.

Among CVDs, the most prominent are coronary artery disease [CAD], acute myocardial infarction [AMI], heart failure [HF], high blood pressure [BP] and cerebrovascular accident [CVA]. In this context, they are influenced by risk factors that can be classified as modifiable and non-modifiable. Modifiable factors include hyperglycemia, hyperlipidemia, obesity, sedentary lifestyle, smoking, alcoholism and poor diet; non-modifiable factors include biological sex, age, ethnicity, family history, among others.

Hyperglycemia, particularly in individuals with diabetes, is a significant modifiable risk factor for CVD. Elevated blood glucose levels contribute to the development of atherosclerosis by promoting endothelial dysfunction and inflammatory processes. A study by Saeedi *et al.* demonstrated that individuals with diabetes have a two-fold increased risk of cardiovascular mortality compared to non-diabetics, emphasizing the importance of glycemic control as a preventive measure<sup>3</sup>.

Dyslipidemia, particularly elevated cholesterol and triglycerides is another critical factor. Hypercholesterolemia has been linked to atherosclerosis, leading to CAD and CVA. Navar *et al.* reported that reductions in LDL cholesterol through statin therapy reduced the incidence of cardiovascular events, underlining the efficacy of lipid management<sup>4</sup>. Furthermore, hypertriglyceridemia has been identified as an independent risk factor for cardiovascular disease, as discussed by Du *et al.*<sup>5</sup>.

Obesity and a sedentary lifestyle are closely linked factors that greatly increase the risk of CVD. The accumulation of adipose tissue, particularly visceral fat, leads to metabolic disturbances such as insulin resistance, dyslipidemia, and hypertension, all of which contribute to atherosclerosis and cardiovascular events. The American Heart Association highlights that obesity, often accompanied by other risk factors like hypertension and dyslipidemia, significantly raises the risk of heart disease. Lavie *et al.* emphasized that both body weight management and increased physical activity led to significant reductions in cardiovascular

mortality<sup>6</sup>. Similarly, the harmful effects of excessive alcohol consumption and smoking are well-documented. Studies such as those by Shield et al.<sup>7</sup> and Skotsimara et al.<sup>8</sup> have shown their contributions to cardiovascular disease progression through oxidative stress and vascular inflammation.

In this context, given the high incidence of CVDs in the Brazilian population and worldwide, they are responsible for a high number of sick leave and early retirements among workers. The work environment is one of the contributors to the development or worsening of such diseases. Health professionals are constantly exposed to conditions of stress and emotional overload and often work long shifts. Therefore, it is particularly essential that this workforce be continuously monitored to identify modifiable risk factors and, from there, develop strategies for prevention and health promotion.

The present study aimed to obtain data on lifestyle habits, history of CVDs and current clinical status of members of the nursing team of a large teaching hospital in the interior of the state of São Paulo; as well as to identify possible modifiable factors and suggest practices for preventing CVDs.

## **METHODS**

This is a prospective, analytical, quantitative epidemiological study of nursing staff at a tertiary-level teaching hospital in the interior of the state of São Paulo (SP - Brazil). The research was conducted in two stages: collection of self-reported data and measurement of anthropometric data. Nursing staff over 18 years of age were included in the study.

In the first stage, potential participants were approached via email. After reading and signing the Free and Informed Consent Form, nurses were invited to complete an electronic self-report form, where data were collected on individual characteristics (sex, age, race, marital status, number of children, city of residence, occupational function); work (length of service at the institution, length of service in the health area, work shift, and number of hours worked); personal history of CVDs (diabetes, CVA, high BP, AMI, CAD, varicose veins, hypercholesterolemia, hypertriglyceridemia); and modifiable cardiovascular risk factors (smoking, alcoholism, sleep, mental health, sports, eating habits).

In the second stage, employees were approached at a time during the workday indicated by the person in charge of the sector, respecting their routines and obligations, in an active search to measure the participants' anthropometric data (weight, height, abdominal circumference [AC], hip circumference [HC], heart rate [HR], systolic blood pressure [SBP], diastolic blood

pressure [DBP]). Furthermore, these data were used to calculate the BMI, waist-to-hip ratio [WHR] and mean arterial pressure [MAP].

The data collected were tabulated in Excel v2308 and analyzed in StatsDirect 3.0 with the aim of evaluating the prevalent modifiable and non-modifiable factors. The analysis was performed using descriptive statistics with data presented in tables.

The research was authorized by the management of the nursing department, submitted to the Institution's Research Ethics Committee for consideration and approved under code 5,671,736. The participants or their legal representatives were informed about the research and the procedures to be performed, and voluntarily accepted the Consent Form, in accordance with resolution no. 466/12 – National Health Council.

## **RESULTS**

Self-reported data were collected from 226 nursing staff members, of which it was possible to measure anthropometric data from 111. The profile of the study population can be characterized as shown in Table 1 - being predominantly composed of young (77.5% under 40 years old) white (81.9%) women (90.3%). Several employees are single (42.0%) and have no children (53.1%); although the majority are in some form of relationship (stable union and married: 54.0%). Also, most of the interviewees live in the city where the study was conducted (73.9%) or in cities within the same Regional Health Department.

Table 1 – Professional Characteristics

| <b>Professional Characteristics</b> | <b>n</b>   | <b>%</b> |
|-------------------------------------|------------|----------|
| <b>Age Range</b>                    |            |          |
| 20 - 29 years                       | 70         | 31.0%    |
| 30 - 39 years                       | 105        | 46.5%    |
| 40 - 49 years                       | 43         | 19.0%    |
| 50 - 59 years                       | 7          | 3.1%     |
| More than 60 years                  | 1          | 0.4%     |
| <b>Gender</b>                       |            |          |
| Female                              | 204        | 90.3%    |
| Male                                | 22         | 9.7%     |
| <b>Self-declared Skin Color</b>     |            |          |
| Yellow                              | 2          | 0.9%     |
| White                               | 185        | 81.9%    |
| Brown                               | 29         | 12.8%    |
| Black                               | 10         | 4.4%     |
| <b>Marital Status</b>               |            |          |
| Single                              | 95         | 42.0%    |
| Stable relationship                 | 29         | 12.8%    |
| Married                             | 93         | 41.2%    |
| Divorced                            | 7          | 3.1%     |
| Widowed                             | 2          | 0.9%     |
| <b>Number of Children</b>           |            |          |
| None                                | 120        | 53.1%    |
| 1                                   | 63         | 27.9%    |
| 2                                   | 37         | 16.4%    |
| 3                                   | 4          | 1.8%     |
| 4                                   | 1          | 0.4%     |
| 5 or more                           | 1          | 0.4%     |
| <b>Total</b>                        | <b>226</b> |          |

When analyzing the professionals' employment data, it is noted that 51.8% of the participants have less than 10 years of experience in the health sector and that most of the interviewees (62.8%) have been working for less than 5 years at the evaluated institution. Regarding work shifts, 65.3% usually work only 1 shift - with a 6-hour workday being the most frequent (42.0%). Regarding non-modifiable cardiovascular risk factors, 82.7% reported having a family member (parents, siblings, uncles, grandparents, children) with CVD, with 49.2% of the fathers and 50.3% of the mothers of employees having CVD. The CVDs with highest prevalence reported in family histories were: hypertension (77.0%), hypercholesterolemia (43.9%), AMI (42.8%), CVA (39.0%) and hypertriglyceridemia (39.0%).

Regarding modifiable CV risk factors, the majority are non-smokers (91.2%) or ex-smokers (5.3%) and, among those who smoke or have smoked, the smoking history is low (<3

pack-years in 75%). Also, 42.9% of participants reported not drinking, while 54.0% reported drinking up to 2 times a week and only 3.1% drank 3 to 5 times a week. The preference for beer correlated positively with the frequency of alcohol intake (100% of those who drank >2x/week), while occasional drinkers (up to 2x/week) were more eclectic in their choice of drink: they consumed beer (81.1%), wine (45.1%) and spirits (26.2%). Most participants reported not having CVD (76.1%), but 9.3% reported having hypercholesterolemia, 6.6% hypertriglyceridemia and 8.4% high BP – see Table 2. Also, only 3.5% reported having diabetes mellitus, of which 25% are not undergoing treatment. Among those who knew they had some CVD, 53.7% claimed not to be treating it, while among those who were treating it, the majority (80.0%) treated it via private health insurance and a smaller portion (16.0%) used the Sistema Único de Saúde [SUS] at their own work institution.

Table 2 – Self-reported Prevalence of Cardiovascular Diseases in Participants

| <b>Self-Reported Cardiovascular Disease</b> | <b>n</b>   | <b>%</b> |
|---------------------------------------------|------------|----------|
| No Cardiovascular Disease                   | 172        | 76.1%    |
| Hypercholesterolemia                        | 21         | 9.3%     |
| High Blood Pressure                         | 19         | 8.4%     |
| Hypertriglyceridemia                        | 15         | 6.6%     |
| Varicose Veins                              | 14         | 6.2%     |
| Diabetes Mellitus                           | 8          | 3.5%     |
| Cerebrovascular Accident                    | 1          | 0.4%     |
| Coronary Artery Disease                     | 1          | 0.4%     |
| Acute Myocardial Infarction                 | 0          | 0.0%     |
| <b>Total</b>                                | <b>226</b> |          |

Still regarding lifestyle habits, the majority reported an adequate average sleep time (72.2% sleep >6h/night), but more than a quarter of the participants (27.9%) sleep less than 6h per night. Furthermore, on a subjective mental health scale from 1 to 5, 58.0% self-rated their mental health as good (>3). For 70.8% of participants, their mental health status was explained by current work conditions.

A complete sedentary lifestyle was reported by almost half of the participants (49.1%) and 31.0% reported practicing less than 150 minutes of physical activity per week, so that only 19.9% exercised adequately (>150 minutes/week). Among the prevalence of sports practiced among non-sedentary individuals, weight training was the most common modality (53.3%), followed by light walking (<5 km/h; 34.8%), fast walking (>5 km/h; 15.7%), light running (10.4%) and Pilates (9.6%).

Regarding eating habits, only 2.7% are vegetarians; and, among the participants, the majority (90.2%) ate at least 1 serving of fruits, vegetables and legumes per day. More than half (52.7%) used to eat more than 3 servings of red meat per week. The consumption of processed

foods is very common: 98.2% of the participants reported eating them at least once a week, while 41.2% eat them 2 to 6 times a week and 12.4% consume them once or more per day. The consumption of sugary drinks (juices, soft drinks, others) is also recurrent: 81.4% consumed at least 1 serving/day, but only 3.5% reported drinking more than 5 servings/day. In a subjective self-assessment of current diet (1 to 5 points), the majority classified themselves as 3 (1: 5.3%; 2: 18.1%; 3: 50.4%; 4: 19.5%; 5: 6.6%).

Finally, from the measurement of anthropometric data of 111 participants, more risk factors were characterized (Table 3). By BMI, it was identified that 69.4% of the participants were overweight (38.7%) or obese (30.6%). By circumferences, it was found that 48.6% had a high waist circumference (>88 cm for women and >102 cm for men) and that 64.0% had a high WHR (>0.80 for women and >0.95 for men). At the time of BP measurement, 67.5% had normal or optimal BP (<130 x 85 mmHg), while 17.1% had BP at levels that could be classified as hypertension (SBP > 140 mmHg or DBP > 90 mmHg). The complete distribution of anthropometric data is found in the appendix (Appendix 1).

Table 3 – Risk Stratification by Anthropometric Data

| <b>Modifiable Risk Factors</b>                    | <b>n</b>   | <b>%</b> |
|---------------------------------------------------|------------|----------|
| <b>Weight Stratification (by Body Mass Index)</b> |            |          |
| Underweight (< 20kg/m <sup>2</sup> )              | 2          | 1.80%    |
| Normal Weight (20 - 25kg/m <sup>2</sup> )         | 32         | 28.83%   |
| Overweight (25 - 30kg/m <sup>2</sup> )            | 43         | 38.74%   |
| Obesity I (30 - 35kg/m <sup>2</sup> )             | 21         | 18.92%   |
| Obesity II (35 - 40kg/m <sup>2</sup> )            | 10         | 9.01%    |
| Obesity III (> 40kg/m <sup>2</sup> )              | 3          | 2.70%    |
| <b>Abdominal Circumference</b>                    |            |          |
| Normal (<88cm for women and <102cm for men)       | 57         | 51.4%    |
| High (>88cm for women and >102cm for men)         | 54         | 48.6%    |
| <b>Waist-to-Hip Ratio</b>                         |            |          |
| Normal (< 0.8 for women and < 0.95 for men)       | 40         | 36.0%    |
| High (> 0.8 for women and > 0.95 for men)         | 71         | 64.0%    |
| <b>Systemic Blood Pressure</b>                    |            |          |
| Optimal (< 120 x 80mmHg)                          | 51         | 45.9%    |
| Normal (< 130 x 85mmHg)                           | 24         | 21.6%    |
| Borderline (130 - 139 x 85 - 89mmHg)              | 17         | 15.3%    |
| Hypertension Stage I (140 - 159 x 90 - 99mmHg)    | 15         | 13.5%    |
| Hypertension Stage II (160 - 179 x 100 - 109mmHg) | 4          | 3.6%     |
| Hypertension Stage III (> 180 x 110mmHg)          | 0          | 0.0%     |
| <b>Total</b>                                      | <b>111</b> |          |

## DISCUSSION

The main results of this study point to some areas of action: insufficient physical activity, inadequate diet, lack of sleep, and lack of adequate diagnosis and treatment for CVDs.

These findings can be compared to a global meta-analysis evaluating cardiovascular risk factors among nurses. In Khani *et al.*'s systematic review, sedentary lifestyle was the most prevalent cardiovascular risk factor among nurses, affecting 46.3% of the population. The global meta-analysis further identified that a significant portion of nurses were overweight (33.3%) or obese (15.3%), which closely parallels the rates reported in this study. However, alcohol consumption was more pronounced in Khani *et al.*'s study, with 24.6% of nurses consuming alcohol, in contrast to lower rates reported in this cohort<sup>9</sup>.

Another critical divergence lies in the prevalence of hypertension. The global meta-analysis reported 11.2% of nurses with SBP  $\geq$ 140 mmHg, while this study highlighted a slightly higher prevalence. This discrepancy may be attributed to demographic or geographic differences in the nurse populations studied<sup>9</sup>.

Also, to mitigate geographic differences, some studies have already attempted to identify the prevalence of risk factors for CVDs in healthcare professionals in Brazil. Magalhães *et al.* described cardiovascular risk factors in 165 nursing professionals from a hospital in Fortaleza, CE: in this study, it was identified that many of the employees were sedentary (64.9%), overweight (56.4%) and with high waist ratio (49.7%), in addition to having family members with high BP (72.9%)<sup>10</sup>.

Also, in Vale do Rio Pardo, RS, Ulguim *et al.* detailed the risks of 45 employees: among them, high rates of overweight or obesity (55.5%), high WHR (73.4%), above-normal body fat percentage (73.3%), borderline or high cholesterol (88.9%) and occupational stress (55.5%) were identified<sup>11</sup>.

Additionally, Ramos *et al.* carried out a descriptive cross-sectional study on health professionals at a hospital in Volta Redonda, RJ, in which 188 individuals were evaluated - among whom the prevalence of sedentary lifestyle (83.5%), alcoholism (35.6%), high BP (22.9%), obesity (20.2%), smoking (19.7%), cholesterol greater than 200mg/dl (10.6%) was identified<sup>12</sup>.

Finally, this study aimed to perform a cardiovascular risk profile of the nursing staff of the institution evaluated based on standardized clinical data, but did not perform laboratory tests, which are of great value for cardiovascular risk stratification. The observed prevalence of modifiable risk factors – such as smoking, alcoholism, sedentary lifestyle and overweight/obesity – is in line with other studies carried out, but these studies indicated a



prevalence of hypertension and laboratory results of hypercholesterolemia and hypertriglyceridemia above the situations self-reported by the participants of the present study, suggesting that the participants are an underdiagnosed group for CVDs.

## **CONCLUSION**

According to the results obtained, it can be observed that there is a tendency for participants to develop new CVDs or worsen existing ones – where the norm seems to be a lifestyle below what is considered healthy by most medical guidelines. The prevalence of CVDs is not irrelevant in the group evaluated and there is considerable room for improvement in adherence to treatments. It is suggested that a large part of the diseases identified are related to modifiable risk factors such as smoking, alcoholism, inadequate sleep, sedentary lifestyle and overweight. The prevalence of these factors and the comparison with other epidemiological studies carried out in health professionals suggests that there is a considerable number of underdiagnosed individuals.

## REFERENCES

1. World Health Organization (WHO) [Internet]. Cardiovascular diseases (CVDs); 11 jun 2021 [accessed: 10 ago 2022]. Available at: [https://www.who.int/news-room/fact-sheets/detail/cardiovascular-diseases-\(cvds\)](https://www.who.int/news-room/fact-sheets/detail/cardiovascular-diseases-(cvds))
2. Godoy MF, Lucena JM, Miquelin AR, Paiva FF, Oliveira DL, Augustin Junior JL, et al. Mortalidade por doenças cardiovasculares e níveis socioeconômicos na população de São José do Rio Preto, estado de São Paulo, Brasil. *Arq Bras Cardiol.* 2007; 88:200-6. DOI: 10.1590/S0066-782X2007000200011
3. Saeedi P, Petersohn I, Salpea P, Malanda B, Karuranga S, Unwin N, Colagiuri S, Guariguata L, Motala AA, Ogurtsova K, Shaw JE. Global and regional diabetes prevalence estimates for 2019 and projections for 2030 and 2045: Results from the International Diabetes Federation Diabetes Atlas. *Diabetes research and clinical practice.* 2019 Nov 1;157:107843.
4. Navar AM, Fine LJ, Ambrosius WT, Brown A, Douglas PS, Johnson K, Khera AV, Lloyd-Jones D, Michos ED, Mujahid M, Muñoz D. Earlier treatment in adults with high lifetime risk of cardiovascular diseases: what prevention trials are feasible and could change clinical practice? Report of a National Heart, Lung, and Blood Institute (NHLBI) workshop. *American journal of preventive cardiology.* 2022 Dec 1;12:100430.
5. Du Z, Qin Y. Dyslipidemia and cardiovascular disease: current knowledge, existing challenges, and new opportunities for management strategies. *Journal of Clinical Medicine.* 2023 Jan 3;12(1):363.
6. Powell-Wiley TM, Poirier P, Burke LE, Després JP, Gordon-Larsen P, Lavie CJ, Lear SA, Ndumele CE, Neeland IJ, Sanders P, St-Onge MP. Obesity and cardiovascular disease: a scientific statement from the American Heart Association. *Circulation.* 2021 May 25;143(21):e984-1010.
7. Shield K, Manthey J, Rylett M, Probst C, Wettlaufer A, Parry CD, Rehm J. National, regional, and global burdens of disease from 2000 to 2016 attributable to alcohol use: a comparative risk assessment study. *The Lancet Public Health.* 2020 Jan 1;5(1):e51-61.
8. Skotsimara G, Antonopoulos AS, Oikonomou E, Siasos G, Ioakeimidis N, Tsalamandris S, Charalambous G, Galiatsatos N, Vlachopoulos C, Tousoulis D. Cardiovascular effects of electronic cigarettes: a systematic review and meta-analysis. *European journal of preventive cardiology.* 2019 Jul;26(11):1219-28.
9. Khani S, Rafiei S, Ghashghaee A, Masoumi M, Rezaee S, Kheradkhah G, Abdollahi B. Cardiovascular risk factors among nurses: A global systematic review and meta-analysis. *Plos one.* 2024 Mar 21;19(3):e0286245.
10. Magalhães FJ, Mendonça LB, Rebouças CB, Lima FE, Custódio IL, Oliveira SC. Fatores de risco para doenças cardiovasculares em profissionais de enfermagem: estratégias de promoção da saúde. *Rev Bras Enferm.* 2014;67:394-400. DOI: 10.5935/0034-7167.20140052
11. Ulguim FO, Renner JD, Pohl HH, Oliveira CF, Bragança GC. Trabalhadores da saúde: risco cardiovascular e estresse ocupacional. *Rev Bras Med Trab.* 2019;17(1):61-8. DOI: 10.5327/Z1679443520190302
12. Ramos MM, Alves AB, Tavares CM, Fagundes Júnior PC, Espírito Santo CD, Ceglias TB, et al. Prevalência de fatores de risco cardiovascular em profissionais de saúde no ambiente de trabalho. *Rev. SOCERJ.* 2006:308-12.

## ATTACHMENTS

### Appendix 1 – Distribution of Anthropometric Data

| Anthropometric Data              | N   | Avg    | CI 95%<br>Max | CI 95%<br>Min | Max    | p95    | p75    | Median | p25    | p5     | Min    |
|----------------------------------|-----|--------|---------------|---------------|--------|--------|--------|--------|--------|--------|--------|
| Age                              | 221 | 34.5   | 35.6          | 33.5          | 67     | 48     | 39     | 33     | 28     | 24     | 23     |
| Age – Female                     | 201 | 34.5   | 35.6          | 33.4          | 67     | 49     | 39     | 33     | 28     | 24     | 23     |
| Age – Male                       | 20  | 35.3   | 38.4          | 32.1          | 48.0   | 46.0   | 40.5   | 35.0   | 30.0   | 24.0   | 24.0   |
| Weight                           | 111 | 77.3   | 80.4          | 74.2          | 114.9  | 105.4  | 91.2   | 74.0   | 64.4   | 53.3   | 43.6   |
| Weight – Female                  | 102 | 76.1   | 79.4          | 72.9          | 114.9  | 103.0  | 88.2   | 73.4   | 64.2   | 53.3   | 43.6   |
| Weight – Male                    | 9   | 91.1   | 99.3          | 82.9          | 106.7  | 106.7  | 98.4   | 91.2   | 87.2   | 70.5   | 70.5   |
| Height                           | 111 | 1.655  | 1.669         | 1.641         | 1.840  | 1.770  | 1.700  | 1.650  | 1.610  | 1.540  | 1.420  |
| Height - Female                  | 102 | 1.645  | 1.658         | 1.631         | 1.780  | 1.750  | 1.690  | 1.650  | 1.600  | 1.540  | 1.420  |
| Altura - Male                    | 9   | 1.771  | 1.803         | 1.739         | 1.840  | 1.840  | 1.800  | 1.750  | 1.740  | 1.730  | 1.730  |
| BMI                              | 111 | 28.165 | 29.209        | 27.121        | 47.475 | 39.704 | 31.846 | 27.233 | 24.583 | 20.663 | 16.914 |
| BMI - Female                     | 102 | 28.076 | 29.186        | 26.965        | 47.475 | 39.704 | 31.446 | 26.809 | 24.583 | 20.663 | 16.914 |
| BMI - Male                       | 9   | 29.178 | 32.508        | 25.849        | 35.651 | 35.651 | 32.131 | 29.442 | 27.233 | 21.759 | 21.759 |
| Abdominal Circumference          | 111 | 91.4   | 93.9          | 88.9          | 134.0  | 119.0  | 101.0  | 90.5   | 81.0   | 73.0   | 71.0   |
| Abdominal Circumference - Female | 102 | 90.9   | 93.6          | 88.3          | 134.0  | 119.0  | 99.0   | 88.5   | 81.0   | 73.0   | 71.0   |
| Abdominal Circumference - Male   | 9   | 97.1   | 105.1         | 89.1          | 110.0  | 110.0  | 104.0  | 98.0   | 91.0   | 76.0   | 76.0   |
| Waist Circumference              | 111 | 108.4  | 110.6         | 106.3         | 140.0  | 130.0  | 116.0  | 107.0  | 100.0  | 92.0   | 86.0   |
| Waist Circumference - Female     | 102 | 108.6  | 110.9         | 106.3         | 140.0  | 130.0  | 116.0  | 107.3  | 100.0  | 92.0   | 86.0   |
| Waist Circumference - Male       | 9   | 106.9  | 113.7         | 100.1         | 120.0  | 120.0  | 113.0  | 105.0  | 100.0  | 95.0   | 95.0   |
| WHR                              | 111 | 0.842  | 0.854         | 0.829         | 1.047  | 0.948  | 0.884  | 0.838  | 0.796  | 0.748  | 0.674  |
| WHR - Female                     | 102 | 0.836  | 0.848         | 0.823         | 1.047  | 0.938  | 0.879  | 0.836  | 0.793  | 0.748  | 0.674  |
| WHR - Male                       | 9   | 0.908  | 0.948         | 0.868         | 0.982  | 0.982  | 0.933  | 0.910  | 0.894  | 0.800  | 0.800  |
| SBP                              | 111 | 121.8  | 124.6         | 119.1         | 165.0  | 147.0  | 131.0  | 120.0  | 111.0  | 103.0  | 93.0   |
| SBP - Female                     | 102 | 121.2  | 124.1         | 118.3         | 165.0  | 147.0  | 129.0  | 118.0  | 111.0  | 103.0  | 93.0   |
| SBP - Male                       | 9   | 129.1  | 135.3         | 122.9         | 144.0  | 144.0  | 135.0  | 126.0  | 125.0  | 119.0  | 119.0  |
| DBP                              | 111 | 76.3   | 78.2          | 74.3          | 103.0  | 94.0   | 83.0   | 76.0   | 69.0   | 59.0   | 52.0   |
| DBP - Female                     | 102 | 76.3   | 78.4          | 74.2          | 103.0  | 94.0   | 83.0   | 76.0   | 69.0   | 59.0   | 52.0   |
| DBP - Male                       | 9   | 75.8   | 79.9          | 71.6          | 82.0   | 82.0   | 79.0   | 78.0   | 74.0   | 67.0   | 67.0   |
| MAP                              | 111 | 91.5   | 93.5          | 89.4          | 123.7  | 111.0  | 99.0   | 90.3   | 83.7   | 74.3   | 68.3   |
| MAP - Female                     | 102 | 91.3   | 93.5          | 89.1          | 123.7  | 111.0  | 99.0   | 89.7   | 83.0   | 74.3   | 68.3   |
| MAP - Male                       | 9   | 93.6   | 97.6          | 89.5          | 100.0  | 100.0  | 96.3   | 94.3   | 89.0   | 85.0   | 85.0   |
| HR                               | 111 | 80.7   | 82.7          | 78.6          | 109.0  | 104.0  | 86.0   | 81.0   | 73.0   | 64.0   | 61.0   |
| HR - Female                      | 102 | 80.6   | 82.7          | 78.5          | 109.0  | 104.0  | 86.0   | 80.5   | 73.0   | 65.0   | 61.0   |
| HR - Male                        | 9   | 81.6   | 91.4          | 71.7          | 99.0   | 99.0   | 92.0   | 82.0   | 73.0   | 63.0   | 63.0   |
